# Supplementary material for: Human activities and landscape features interact to closely define the distribution and dispersal of an urban commensal
Source: PubMed Central journal article supplement (PMC6183452; doi:10.1111/eva.12650), 2018-07-21

(a)

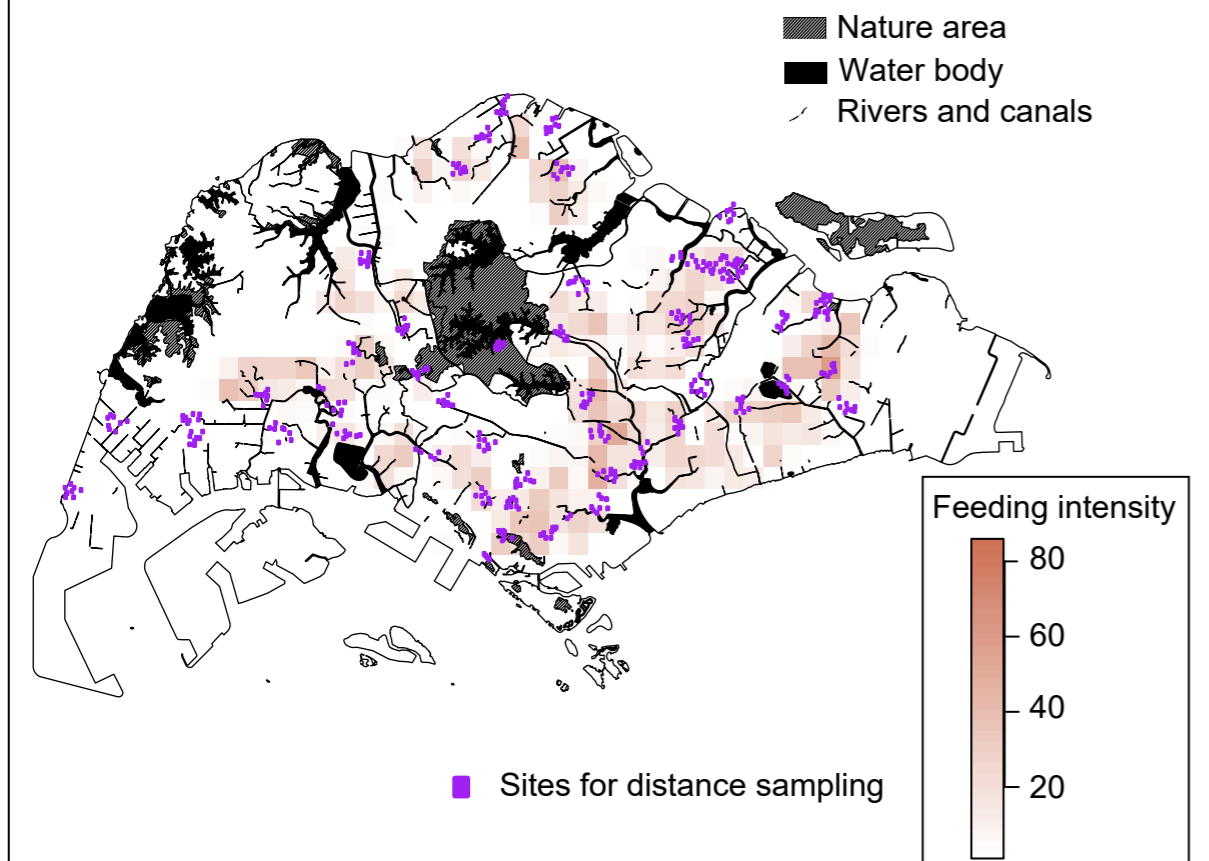

(b)

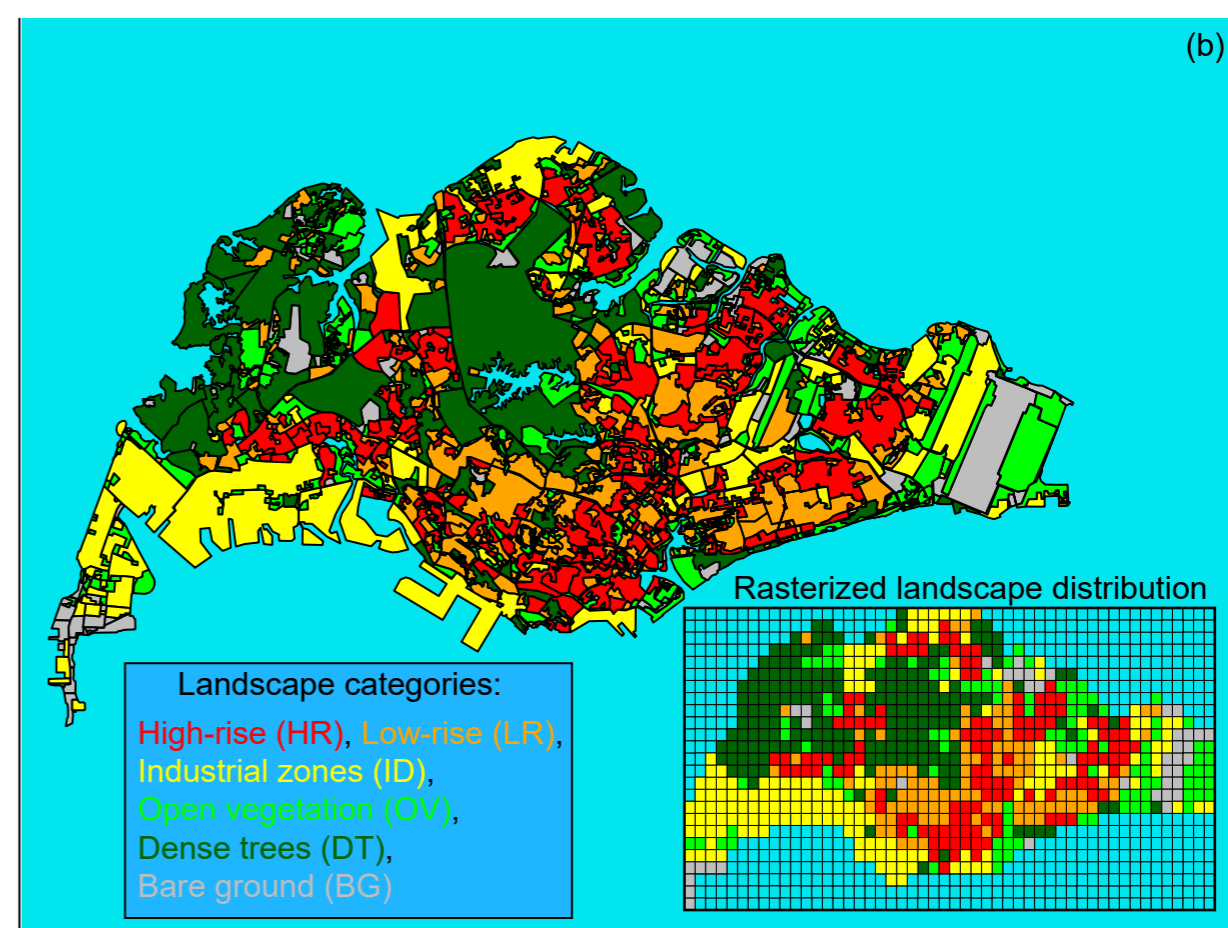

(c)

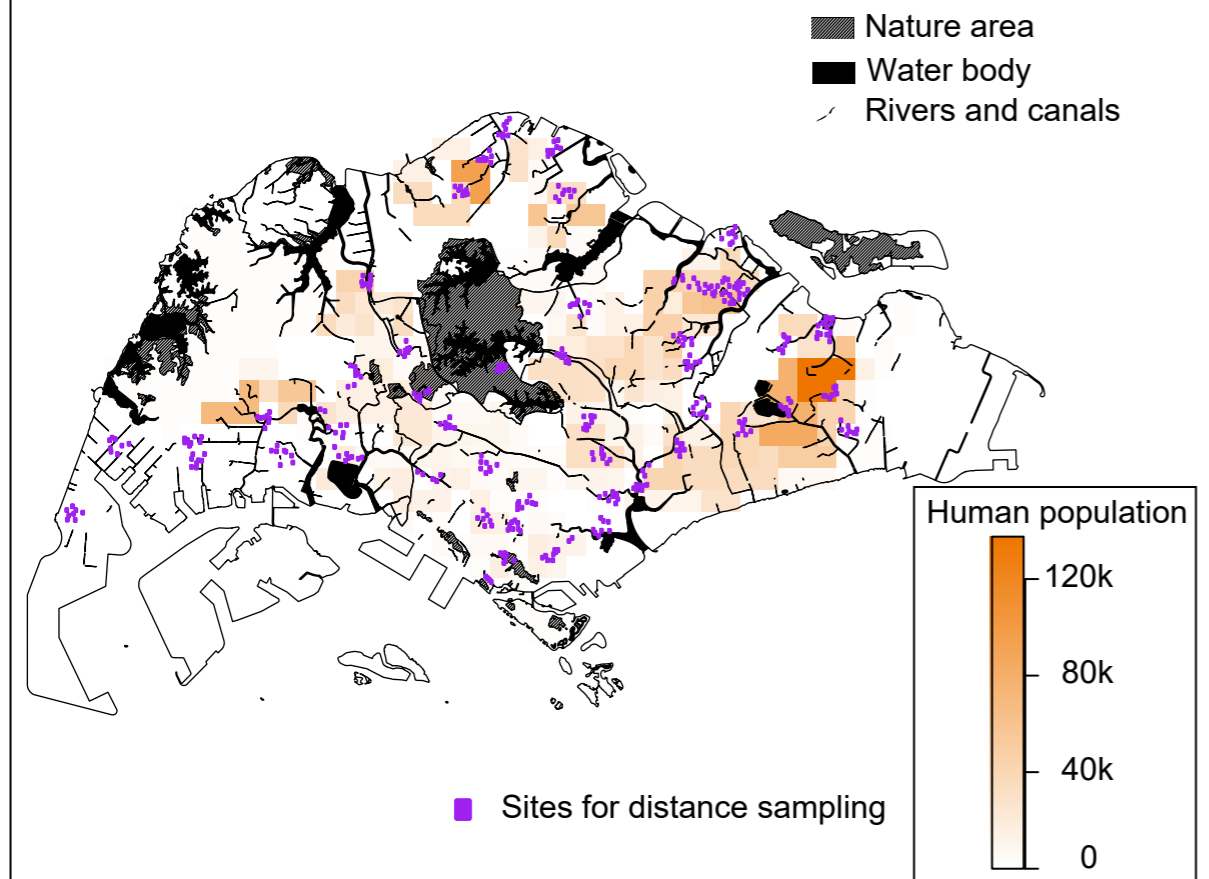

(d)

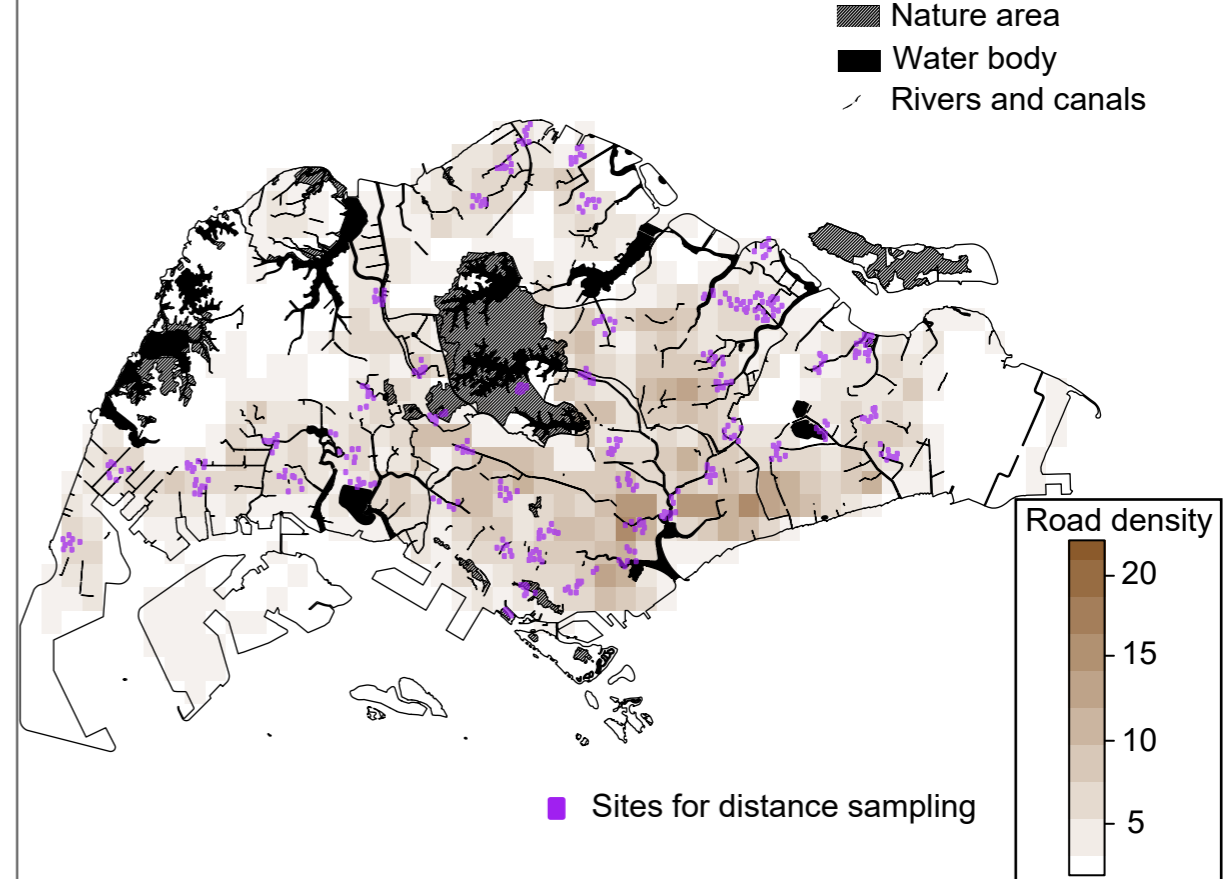

- Nature area
- Water body
- Rivers and canals

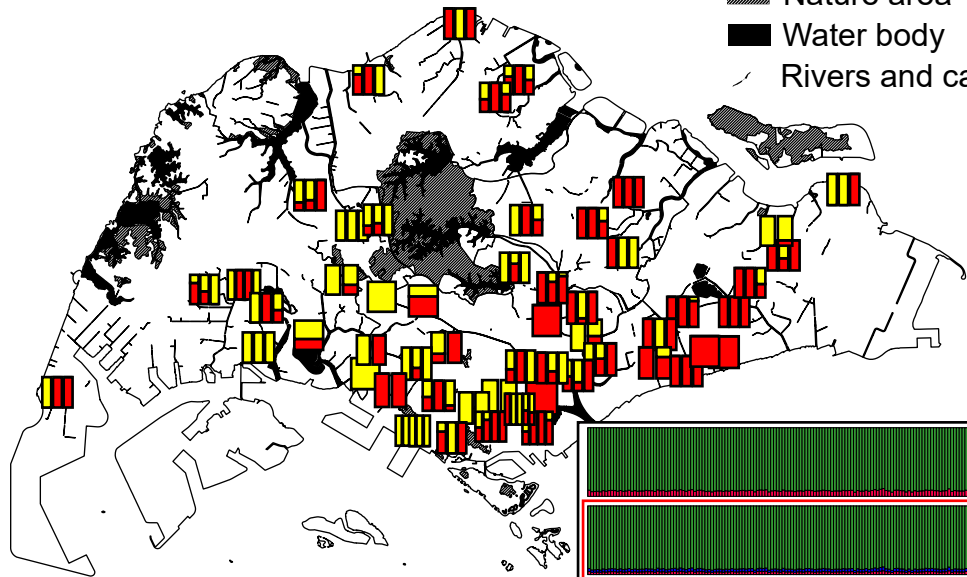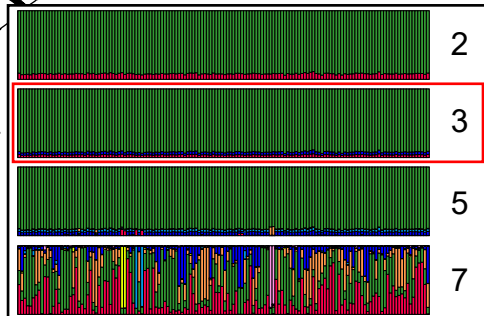

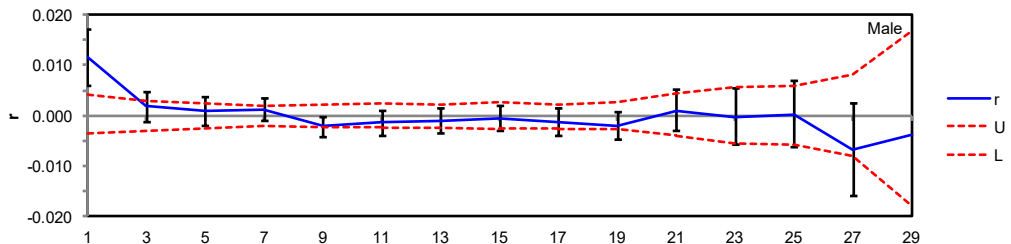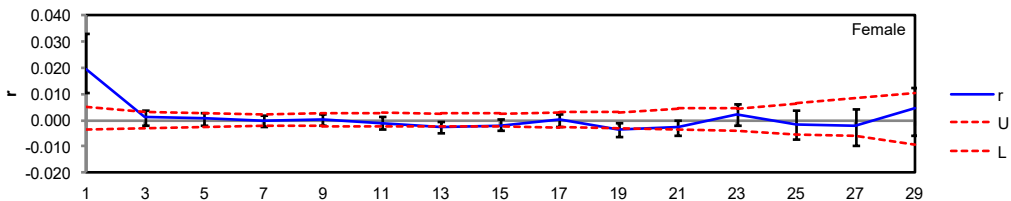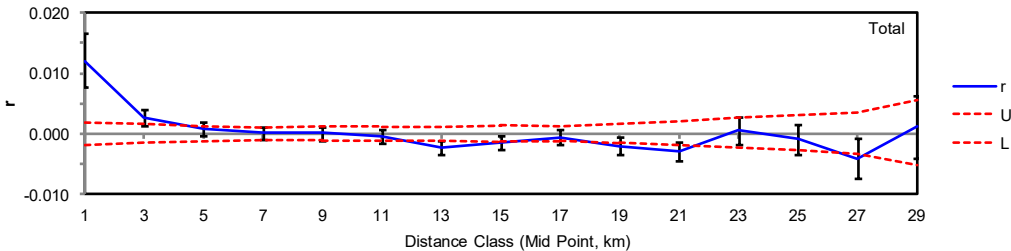

Supplement: EVA-11-1598-s001.pdf [file EVA-11-1598-s001.pdf]
